# Supplementary material for: Genome sequencing reveals complex speciation in the Drosophila simulans clade
Source: HighWire-hosted journal article supplement (doi:10.1101/gr.130922.111), 2012-04-13
Supplement: SuppLegends.docx [file SuppLegends.docx]

Supporting Information

**Supplementary Methods.**

**Table S1.** Median read depth, total alignment length, and the percent of the *D. melanogaster* reference genome sequence length covered by the alignment for each of the three species of the *D. simulans* clade.

**Table S2.** Average frequency of optimal codons (*F*op) across genes.

**Table S3.** The number of coding substitutions between the *D. simulans*-clade ancestor and each of the three extant species.

**Figure S1.** Base mismatch frequencies for each of the three species alignments against release 5.31 of the *Drosophila melanogaster* reference genome.

**Figure S2.** Distribution of site type frequencies in 5-kb windows. Both the major autosomal arms and the *X* chromosome are divided into non-overlapping 5-kb windows. Within each window, the frequency of each of the six possible type of variable site is calculated. Panel (**a**) shows the distribution of frequencies for site types in which the derived base occurs exclusively in one of the three species of the *D. simulans* clade. The distribution is shown for both the autosomes and the *X* chromosome. The ends of the whiskers represent 1.5 times the interquartile range and a “+” character represents an outlier. Similarly, panel (**b**) shows the distribution of the frequencies of site types that are shared between pairs of species.

**Figure S3.** Fit of the quantiles of the six different site types on the major autosomal arms with the best-fitting simulated global allopatric model.

**Figure S4.** Fit of the quantiles of the six different site types on the *X* chromosome with the best-fitting simulated global allopatric model.

**Figure S5.** Histograms of *p*-values resulting from the likelihood ratio test performed on a data set that was generated under the null model of strict allopatry.

**Figure S6.** Four histograms of *p*-values associated with the test for complex speciation in 1- and 5-kb windows for both the autosomes and the *X* chromosome.

**Figure S7.** Test for complex speciation on the *X* chromosome. The figure follows the format of **Figure 4**, only autosomal values are replaced with estimates for 1-kb windows on the *X* chromosome.

**Figure S8.** Decomposition of *R*2 values and relative importance from multiple regression analysis of the six different site type frequencies and the *p*-value from the test for complex speciation.
